# Supplementary material for: Mechanochemical interconversion between discrete complexes and coordination networks – formal hydration/dehydration by LAG
Source: Royal Society of Chemistry journal article supplement (doi:10.1039/c2ce06469c), 2012-01-01
Supplement: c2ce06469c.pdf [file c2ce06469c.pdf]

## Mechanochemical interconversion between discrete complexes and coordination networks – formal hydration/dehydration by LAG

Pipi Wang, Guanjun Li, Yiping Chen, Shangwen Chen, Stuart L. James,\* and Wenbing Yuan\*

Supplementary information: XRPD patterns, TGA curves.

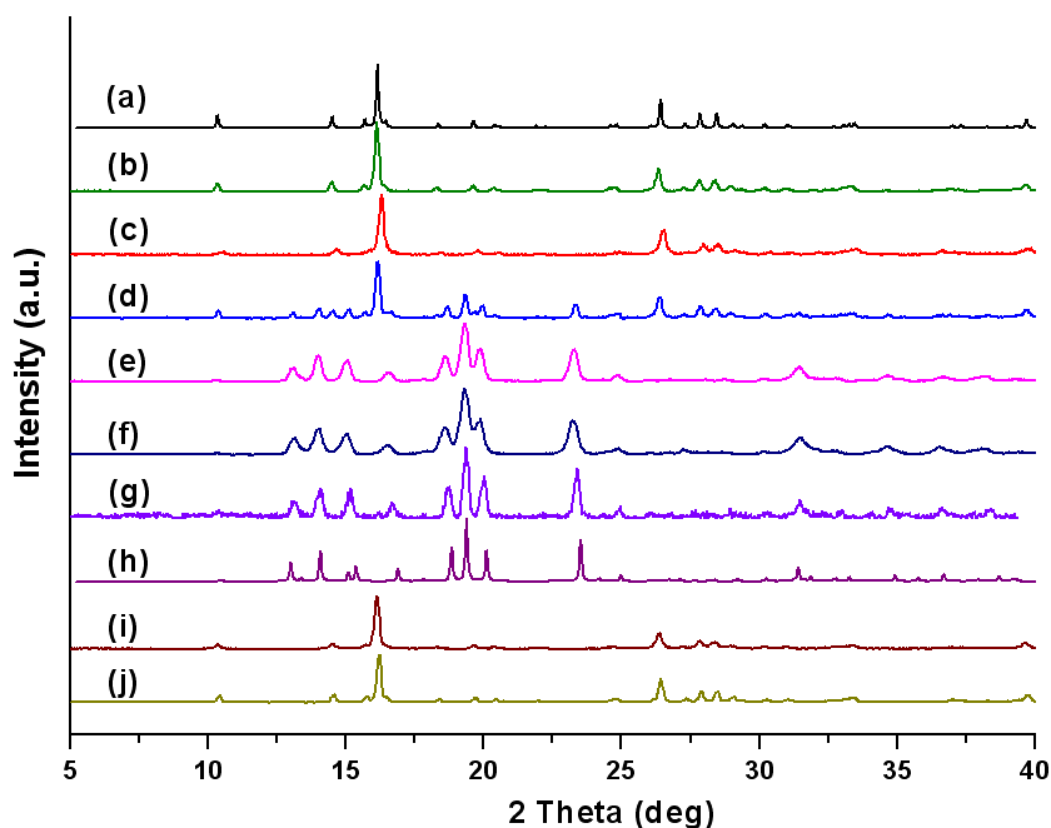

**Figure S1** XRPD patterns for interconversions between **1** and **2**: (a) simulated pattern for **1** (CSD code INICZN); (b) submerging **1** in excess methanol for 24 hours; (c) grinding **1** with MeOH (100  $\mu$ L) for 30 min at 650 rpm; (d) grinding **1** with MeOH (200  $\mu$ L) for 60min at 750 rpm. (e) grinding **1** with MeOH (200  $\mu$ L) for 90min at 20Hz in a shaking ball mill (QM-3B); (f) heating **1** at 200°C for 12 hours; (g) submerging **1** in excess methanol for 3 days; (h) simulated pattern for **2** (CSD code JUKVEQ); (i) grinding **2** with H<sub>2</sub>O (100  $\mu$ L) for 30min at 650rpm/min; (j) submerging **2** in excess water for 24 hours.

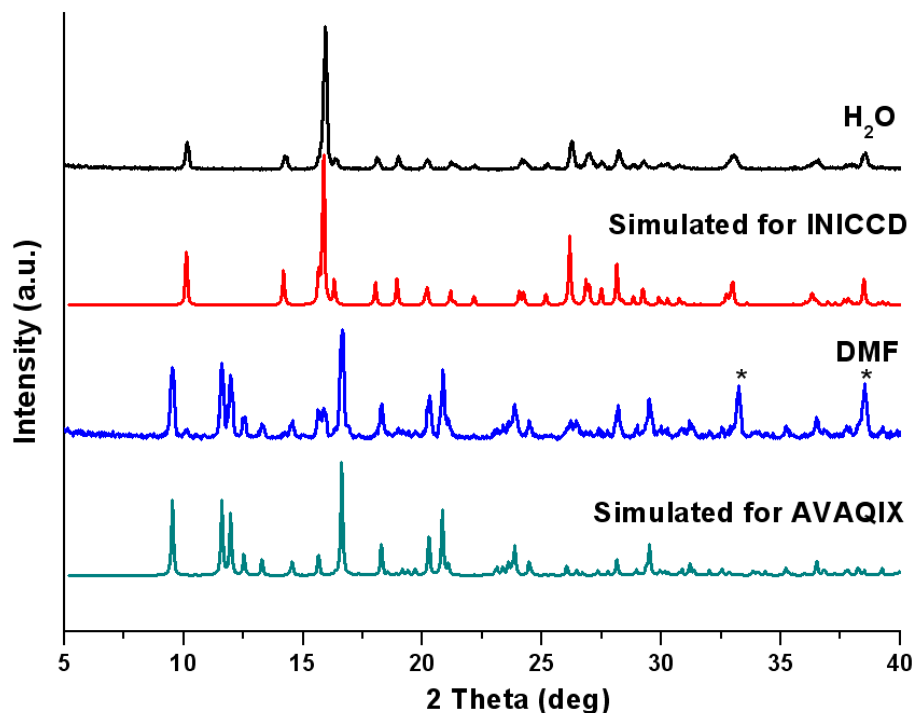

**Figure S2** Comparison of XRPD patterns for products of mechanochemical reactions between CdO and HINA using LAG. The volume of the added solvent is 100  $\mu$ L. Peaks due to unreacted CdO are labelled \*. INICCD and AVAQIX are CCD codes for  $[\text{Cd}(\text{INA})_2(\text{OH}_2)_4]$  (**3**) and  $[\text{Cd}(\text{INA})_2(\text{OH}_2)] \cdot \text{DMF}$  (**4**) respectively.

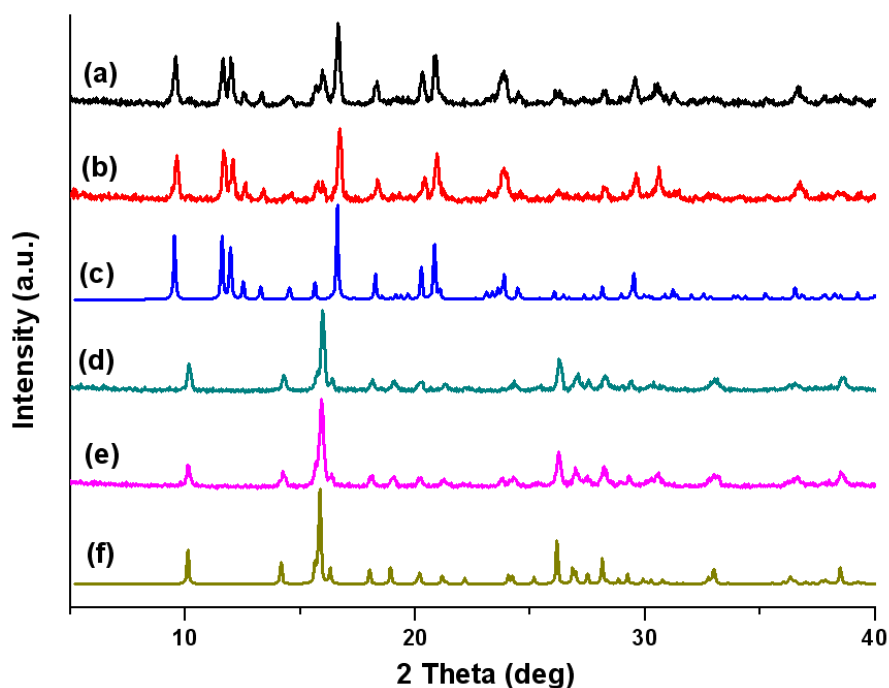

**Figure S3** XRPD patterns for interconversions between **3** and **4**: (a) grinding **3** with DMF (100  $\mu$ L) for 90min at 750 rpm; (b) submerging **3** in excess DMF for 24 hours; (c) simulated pattern for **4** (CSD code AVAQIX); (d) grinding **4** with  $\text{H}_2\text{O}$  (200  $\mu$ L) for 90min at 750 rpm; (e) submerging **4** in excess  $\text{H}_2\text{O}$  for 24 hours; (f) simulated pattern for **3** (CSD code INICCD).

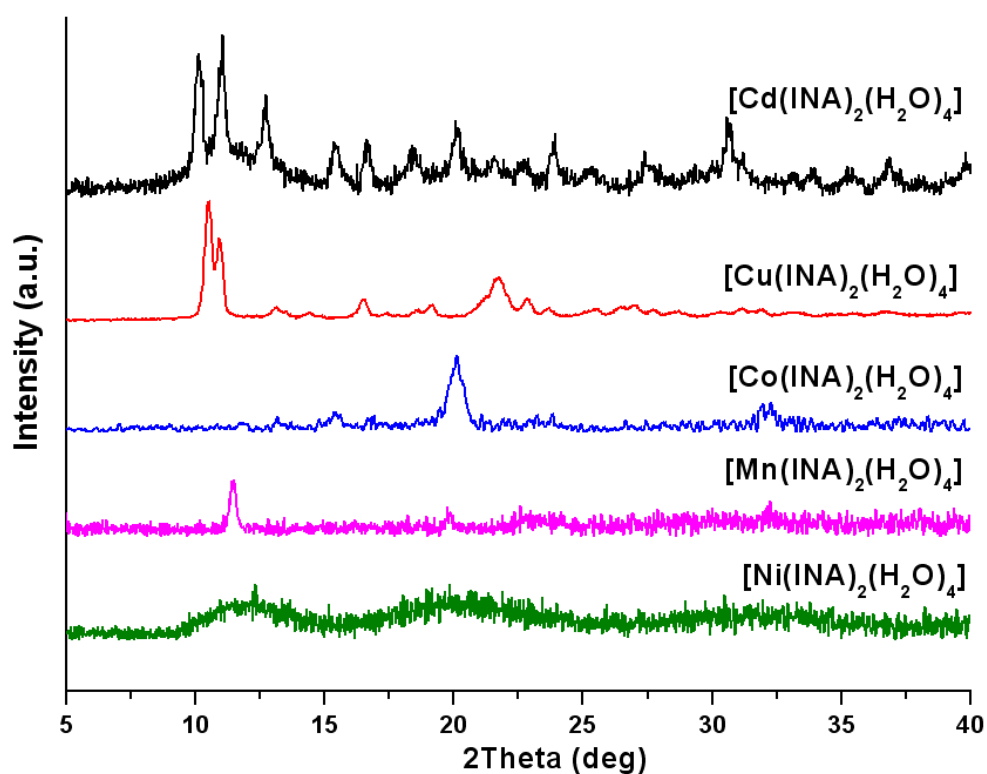

**Figure S3.** XRPD patterns for the products of heating  $[M(\text{INA})_2(\text{H}_2\text{O})_4]$  ( $M = \text{Cd}, \text{Cu}, \text{Co}, \text{Mn}$  and  $\text{Ni}$ ) at  $150^\circ\text{C}$  for 12 hours (for  $\text{Cd}$  and  $\text{Cu}$ ) and 2 hours (for  $\text{Co}, \text{Mn}$  and  $\text{Ni}$ ).

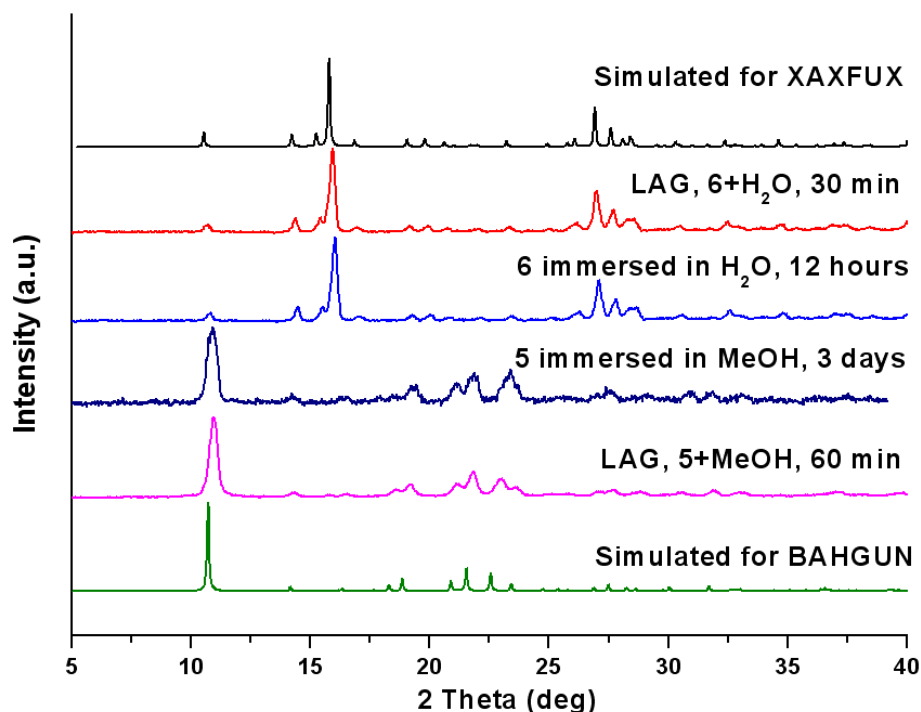

**Figure S4.** XRPD patterns for interconversions between compounds **5** and **6**. CSD codes XAXFUX and BAHGUN correspond to  $[\text{Cu}(\text{INA})_2(\text{H}_2\text{O})_4]$  (**5**) and  $[\text{Cu}(\text{INA})_2]$  (**6**) respectively.
